# Supplementary material for: Genome-Wide Association Mapping of Oil Content and Seed-Related Traits in Shea Tree (Vitellaria paradoxa subsp. nilotica) Populations
Source: MDPI journal article supplement (doi:10.3390/horticulturae9070811), 2023-07-14
Supplement: s1 [file s1]

Supplementary Table S1:

|           |           |           |           |          |           |           |           |           |           |           |
|-----------|-----------|-----------|-----------|----------|-----------|-----------|-----------|-----------|-----------|-----------|
| SHEATP42  | SHEAOV38  | SHEARO210 | SHEATS34  | SHEASW27 | SHEAST37  | SHEAS17   | SHEABS23  | SHEATS110 | SHEATP110 | SHEATA28  |
| SHEATP44  | SHEAHP37  | SHEABS27  | SHEATS310 | SHEAHP29 | SHEARO35  | SHEAEP210 | SHEATP49  | SHEASM14  | SHEASP56  | SHEARS24  |
| SHEATP39  | SHEAHA29  | SHEABS17  | SHEAHP39  | SHEARO36 | SHEAST36  | SHEASP29  | SHEATS51  | SHEATS15  | SHEAEL34  | SHEARS15  |
| SHEARO16  | SHEAST34  | SHEARO17  | SHEADT27  | SHEAHP22 | SHEASW32  | SHEAHP24  | SHEAEL19  | SHEARO34  | SHEABO36  | SHEARS28  |
| SHEATP12  | SHEAST110 | SHEATA11  | SHEAHP16  | SHEABO18 | SHEASM26  | SHEAHP12  | SHEASW39  | SHEASM11  | SHEAST39  | SHEABS42  |
| SHEABO14  | SHEAST17  | SHEASM39  | SHEAOV18  | SHEAEL55 | SHEARS210 | SHEASP21  | SHEAOV21  | SHEARO310 | SHEARS29  | SHEATP24  |
| SHEASP11  | SHEATS43  | SHEAHA13  | SHEASP18  | SHEASW38 | SHEAEL28  | SHEARS16  | SHEAHA18  | SHEASP31  | SHEATP210 | SHEATP28  |
| SHEASM17  | SHEASW14  | SHEASW33  | SHEAEL24  | SHEASM22 | SHEATA13  | SHEASP23  | SHEASW19  | SHEAHA11  | SHEATP11  | SHEARS17  |
| SHEABO17  | SHEAEL13  | SHEAHP35  | SHEAHA26  | SHEABS38 | SHEABO39  | SHEASW310 | SHEAHA310 | SHEASP36  | SHEATS510 | SHEAOV11  |
| SHEAOV24  | SHEATS410 | SHEARE35  | SHEAPH210 | SHEADT22 | SHEAHA39  | SHEARO27  | SHEASP41  | SHEASW28  | SHEAEL18  | SHEASM15  |
| SHEASW11  | SHEAOV210 | SHEASP34  | SHEAEL37  | SHEARO18 | SHEASW311 | SHEAEL33  | SHEABO23  | SHEARS23  | SHEAOV16  | SHEATP21  |
| SHEAHA32  | SHEATS11  | SHEAEL36  | SHEAHP15  | SHEATS12 | SHEASW13  | SHEAHA110 | SHEASP25  | SHEARS27  | SHEABO11  | SHEARS13  |
| SHEAEP11  | SHEATS21  | SHEAOV26  | SHEASM18  | SHEARO13 | SHEASW17  | SHEAHP210 | SHEATP18  | SHEASM32  | SHEAST28  | SHEATS52  |
| SHEARE23  | SHEATS24  | SHEASM33  | SHEABO15  | SHEABO16 | SHEARO47  | SHEAHP34  | SHEASM21  | SHEAHP27  | SHEASP37  | SHEASW35  |
| SHEASW22  | SHEATS27  | SHEADT29  | SHEAHP25  | SHEARO42 | SHEABO13  | SHEAST22  | SHEABO29  | SHEAEL410 | SHEAHP11  | SHEATP32  |
| SHEABS18  | SHEATS29  | SHEASW16  | SHEAOV13  | SHEAEL21 | SHEAHA19  | SHEASW110 | SHEARS12  | SHEAHP33  | SHEATP36  | SHEAHA15  |
| SHEAST210 | SHEASP17  | SHEADT24  | SHEABS39  | SHEAEP12 | SHEAHP36  | SHEABS11  | SHEAEL53  | SHEATP15  | SHEASM27  | SHEAHP38  |
| SHEASW24  | SHEAEL38  | SHEABO35  | SHEAST31  | SHEAHP23 | SHEAST12  | SHEABO21  | SHEAST13  | SHEATP27  | SHEAHP19  | SHEASP14  |
| SHEAEL22  | SHEARE21  | SHEAEL46  | SHEAST32  | SHEAHA16 | SHEARO28  | SHEASP26  | SHEATS58  | SHEASP35  | SHEASM24  | SHEABO32  |
| SHEAHP26  | SHEATA18  | SHEAEL17  | SHEARO15  | SHEABO28 | SHEAST16  | SHEASM25  | SHEATS16  | SHEASM19  | SHEATP16  | SHEATS210 |
| SHEAST23  | SHEASP39  | SHEASP410 | SHEAPH25  | SHEABS12 | SHEASM310 | SHEAEL12  | SHEAOV31  | SHEAEL26  | SHEAOV35  | SHEAOV22  |
| SHEAOV37  | SHEARO11  | SHEASP12  | SHEASW44  | SHEAOV32 | SHEABO27  | SHEASP22  | SHEARO38  | SHEASP510 | SHEASP110 | SHEABS14  |
| SHEARO24  | SHEABS13  | SHEAEL210 | SHEATS41  | SHEABS15 | SHEABO37  | SHEARO32  | SHEATP43  | SHEABO25  | SHEABO38  | SHEARO29  |
| SHEASP19  | SHEASP27  | SHEAHA21  | SHEATS17  | SHEAST33 | SHEATP41  | SHEABO110 | SHEAOV28  | SHEATP19  | SHEAOV14  | SHEAEL43  |
| SHEABS46  | SHEATA32  | SHEAHA25  | SHEASM110 | SHEASM38 | SHEARE33  | SHEASP310 | SHEASP33  | SHEARO39  | SHEATP47  | SHEAEL45  |

|          |          |           |           |           |          |           |           |          |           |          |
|----------|----------|-----------|-----------|-----------|----------|-----------|-----------|----------|-----------|----------|
| SHEAHA36 | SHEAEL15 | SHEATA27  | SHEAST24  | SHEARO37  | SHEARO31 | SHEAST26  | SHEAHA14  | SHEAHA31 | SHEAEL29  | SHEASW12 |
| SHEAHA23 | SHEADT26 | SHEAHA27  | SHEASP38  | SHEARS111 | SHEATP13 | SHEAEP25  | SHEASW26  | SHEATP34 | SHEASM210 | SHEATS49 |
| SHEATS55 | SHEABO26 | SHEAOV34  | SHEATP310 | SHEATA22  | SHEABO24 | SHEAST21  | SHEAHP110 | SHEARO12 | SHEAEL39  | SHEAOV29 |
| SHEATS14 | SHEATA21 | SHEASW23  | SHEAST18  | SHEASM35  | SHEAOV23 | SHEAEL14  | SHEAHP13  | SHEARO26 | SHEAEL310 | SHEASW18 |
| SHEAHA17 | SHEATS18 | SHEABO34  | SHEASP13  | SHEAHP14  | SHEASM12 | SHEARO19  | SHEARO14  | SHEASN12 | SHEABS210 | SHEASM31 |
| SHEAOV25 | SHEAHA38 | SHEAST310 | SHEABS28  | SHEATS19  | SHEABO12 | SHEARO110 | SHEATP25  | SHEASW21 | SHEASP58  | SHEARS26 |
| SHEAOV39 | SHEASW25 | SHEAST29  | SHEASP16  | SHEABS21  | SHEATP23 | SHEABS45  | SHEASW210 | SHEAHP31 | SHEASW29  | SHEAHP18 |
| SHEABO19 | SHEAST19 | SHEARO21  | SHEASP45  | SHEABO22  | SHEABS16 | SHEAOV19  | SHEASM13  | SHEATP17 | SHEASW34  | SHEAHA24 |
| SHEARO22 | SHEABS22 | SHEASM36  | SHEAHA28  | SHEATA29  | SHEAHA12 | SHEAHP28  | SHEAEL35  | SHEARE22 | SHEASW312 | SHEASP15 |

---

Supplementary Table S2: Candidate genes at QTL region searched within approximately  $\pm 20$  Kb region of significant SNP markers. The identified genes is believed to be playing an important part in oil yield variation in shea tree.

| SNP                  | Chr | SNP<br>Position | Start    | End      | Genes                                | Annotation                                                                                                                                                                                                                                                                                                                                                                                                                                                  |
|----------------------|-----|-----------------|----------|----------|--------------------------------------|-------------------------------------------------------------------------------------------------------------------------------------------------------------------------------------------------------------------------------------------------------------------------------------------------------------------------------------------------------------------------------------------------------------------------------------------------------------|
|                      |     |                 |          |          |                                      | Gene Ontology (GO.OBO)                                                                                                                                                                                                                                                                                                                                                                                                                                      |
| Trait: Kernel length |     |                 |          |          |                                      |                                                                                                                                                                                                                                                                                                                                                                                                                                                             |
| S1_76647305          | 1   | 76647305        | 76642517 | 76649841 | Acyl-ACP Thioesterase Fat B (FATB)   | GO:0005634;GO:0006334 PTHR11875:SF126: NAP1-RELATED PROTEIN 2; IPR037231: NAP-like superfamily; G3DSA:3.30.1120.90: -; Coil: Coil; IPR002164: Nucleosome assembly protein (NAP)                                                                                                                                                                                                                                                                             |
| S6_46530240          | 6   | 46530240        | 46538324 | 46541412 | Fatty acid desaturases (FADs)        | PTHR23155: DISEASE RESISTANCE PROTEIN RP; SSF52047: RNI-like; PTHR23155:SF962: OS08G0539900 PROTEIN                                                                                                                                                                                                                                                                                                                                                         |
| Trait: Kernel width  |     |                 |          |          |                                      |                                                                                                                                                                                                                                                                                                                                                                                                                                                             |
| S7_45737117          | 7   | 45737117        | 45731235 | 45739404 | Long Chain Acyl-CoA Synthetas (LACS) | GO:0003824;GO:0004619;GO:0005737;GO:0006007;GO:0030145;GO:0046872 IPR011258: BPG-independent PGAM, N-terminal; IPR036646: BPG-independent phosphoglycerate mutase, domain B superfamily; Coil: Coil; IPR005995: Phosphoglycerate mutase, 2,3-bisphosphoglycerate-independent; IPR006124: Metalloenzyme; PTHR31637:SF7: 2,3-BISPHOSPHOGLYCERATE-INDEPENDENT PHOSPHOGLYCERATE MUTASE 2-RELATED; IPR017850: Alkaline-phosphatase-like, core domain superfamily |
| S12_32853547         | 12  | 32853547        | 32850936 | 32857952 | 3-ketoacyl-ACP synthase II (KASII)   | GO:0003824 IPR000192: Aminotransferase class V domain; cd06451: AGAT_like; IPR015424: Pyridoxal phosphate-dependent transferase; IPR020578: Aminotransferase class-V, pyridoxal-phosphate binding site; PTHR21152:SF24: SERINE--PYRUVATE                                                                                                                                                                                                                    |

|                           |   |          |          |          |                                 |                                                                                                                                                                                                                                                                                                                                                                                                                                                                                                                                                                                                                                                                                                                                                                                                                                                                                                         |
|---------------------------|---|----------|----------|----------|---------------------------------|---------------------------------------------------------------------------------------------------------------------------------------------------------------------------------------------------------------------------------------------------------------------------------------------------------------------------------------------------------------------------------------------------------------------------------------------------------------------------------------------------------------------------------------------------------------------------------------------------------------------------------------------------------------------------------------------------------------------------------------------------------------------------------------------------------------------------------------------------------------------------------------------------------|
|                           |   |          |          |          |                                 | AMINOTRANSFERASE; IPR015421: Pyridoxal phosphate-dependent transferase, major domain; PTHR21152: AMINOTRANSFERASE CLASS V; IPR015422: Pyridoxal phosphate-dependent transferase domain 1; IPR024169: Serine-pyruvate aminotransferase/2-aminoethylphosphonate-pyruvate transaminase                                                                                                                                                                                                                                                                                                                                                                                                                                                                                                                                                                                                                     |
| <b>Trait: Oil content</b> |   |          |          |          |                                 |                                                                                                                                                                                                                                                                                                                                                                                                                                                                                                                                                                                                                                                                                                                                                                                                                                                                                                         |
| S8_41696703               | 8 | 41696703 | 41709109 | 41713918 | Acyl-CoA-binding protein (ACBP) | GO:0046872 PTHR12506: PROTEIN PHOSPHATASE RELATED; PTHR12506:SF51: ZINC FINGER CCCH DOMAIN-CONTAINING PROTEIN 67-LIKE ISOFORM X1; G3DSA:2.30.30.1190: -; mobidb-lite: consensus disorder prediction; IPR000571: Zinc finger, CCCH-type; IPR036855: Zinc finger, CCCH-type superfamily; G3DSA:4.10.1000.10: CCCH zinc finger                                                                                                                                                                                                                                                                                                                                                                                                                                                                                                                                                                             |
| S9_8298654                | 9 | 8298654  | 8284421  | 8294168  | Fatty acid exporter (FAX2)      | GO:0003993;GO:0005515;GO:0016787;GO:0046872 IPR004843: Calcineurin-like phosphoesterase domain, ApaH type; IPR029052: Metallo-dependent phosphatase-like; SignalP-noTM: SignalP-noTM; PTHR22953:SF130: PURPLE ACID PHOSPHATASE; SIGNAL_PEPTIDE_C_REGION: C-terminal region of a signal peptide.; SSF56300: Metallo-dependent phosphatases; IPR039331: Purple acid phosphatase-like; IPR003961: Fibronectin type III; SIGNAL_PEPTIDE_N_REGION: N-terminal region of a signal peptide.; IPR015914: Purple acid phosphatase, N-terminal; IPR008963: Purple acid phosphatase-like, N-terminal; SIGNAL_PEPTIDE_H_REGION: Hydrophobic region of a signal peptide.; SIGNAL_PEPTIDE: Signal peptide region; IPR025733: Iron/zinc purple acid phosphatase-like C-terminal domain; IPR041792: Purple acid phosphatase, metallophosphatase domain; PS51257: Prokaryotic membrane lipoprotein lipid attachment site |

|             |   |          |          |          |                                 |                                                                                                                                        |
|-------------|---|----------|----------|----------|---------------------------------|----------------------------------------------------------------------------------------------------------------------------------------|
|             |   |          |          |          |                                 | profile.; NON_CYTOPLASMIC_DOMAIN: Region of a membrane-bound protein predicted to be outside the membrane, in the extracellular region |
| S9_32689981 | 9 | 32689981 | 32688415 | 32689337 | Acyl-CoA-binding protein (ACBP) | IPR005050: Early nodulin 93 ENOD93 protein; TMhelix: Region of a membrane-bound protein predicted to be embedded in the membrane.      |
